# Supplementary material for: Electrochemical performances and gassing behavior of high surface area titanium niobium oxides
Source: Royal Society of Chemistry journal article supplement (doi:10.1039/c6ta03813a), 2016-01-01
Supplement: c6ta03813a1.pdf [file c6ta03813a1.pdf]

Supplemental Information for

**Electrochemical performances and gassing behavior of high surface area titanium niobium oxides**

Lucienne Buannic <sup>a,\*,1</sup>, Jean-François Colin <sup>a</sup>, Marlène Chapuis <sup>a</sup>, Mohamed Chakir <sup>b</sup>, Sébastien Patoux <sup>a</sup>

<sup>a</sup> CEA, LITEN, LCB, 17 rue des Martyrs, F-38054 Grenoble cedex 9, France

<sup>b</sup> Renault, Technocentre, 1 avenue du Golf, 78288 Guyancourt, France

\* Corresponding Author: CIC Energigune, Parque Tecnológico de Álava, Albert Einstein 48, 01510 Miñano, Spain. Tel: +34 945 29 71 08. Email: lbuannic@cicenergigune.com

---

<sup>1</sup> Present address: CIC Energigune, Parque Tecnológico de Álava, Albert Einstein 48, 01510 Miñano, Spain

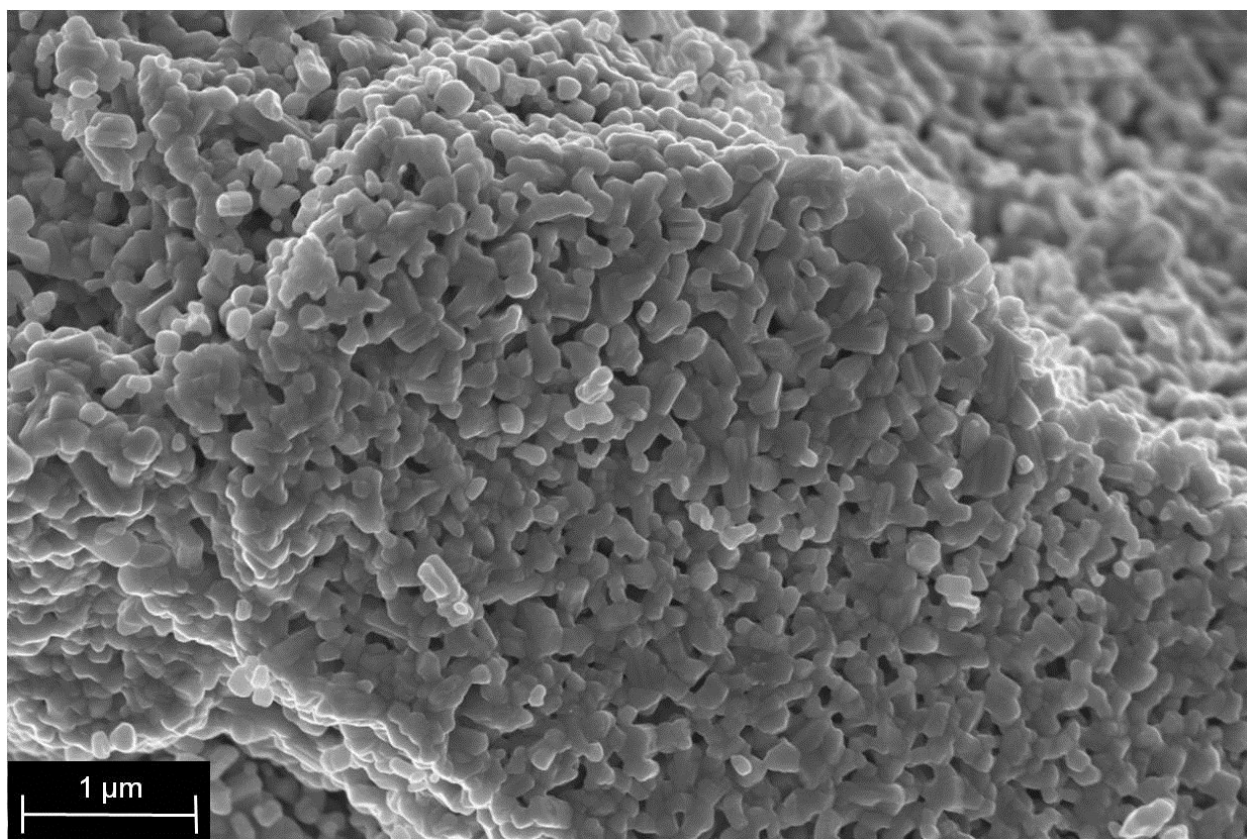

*Supplemental Figure S1. SEM of TNO29-ST-BM-950 illustrating the highly interconnected 3D network of nanoparticles.*

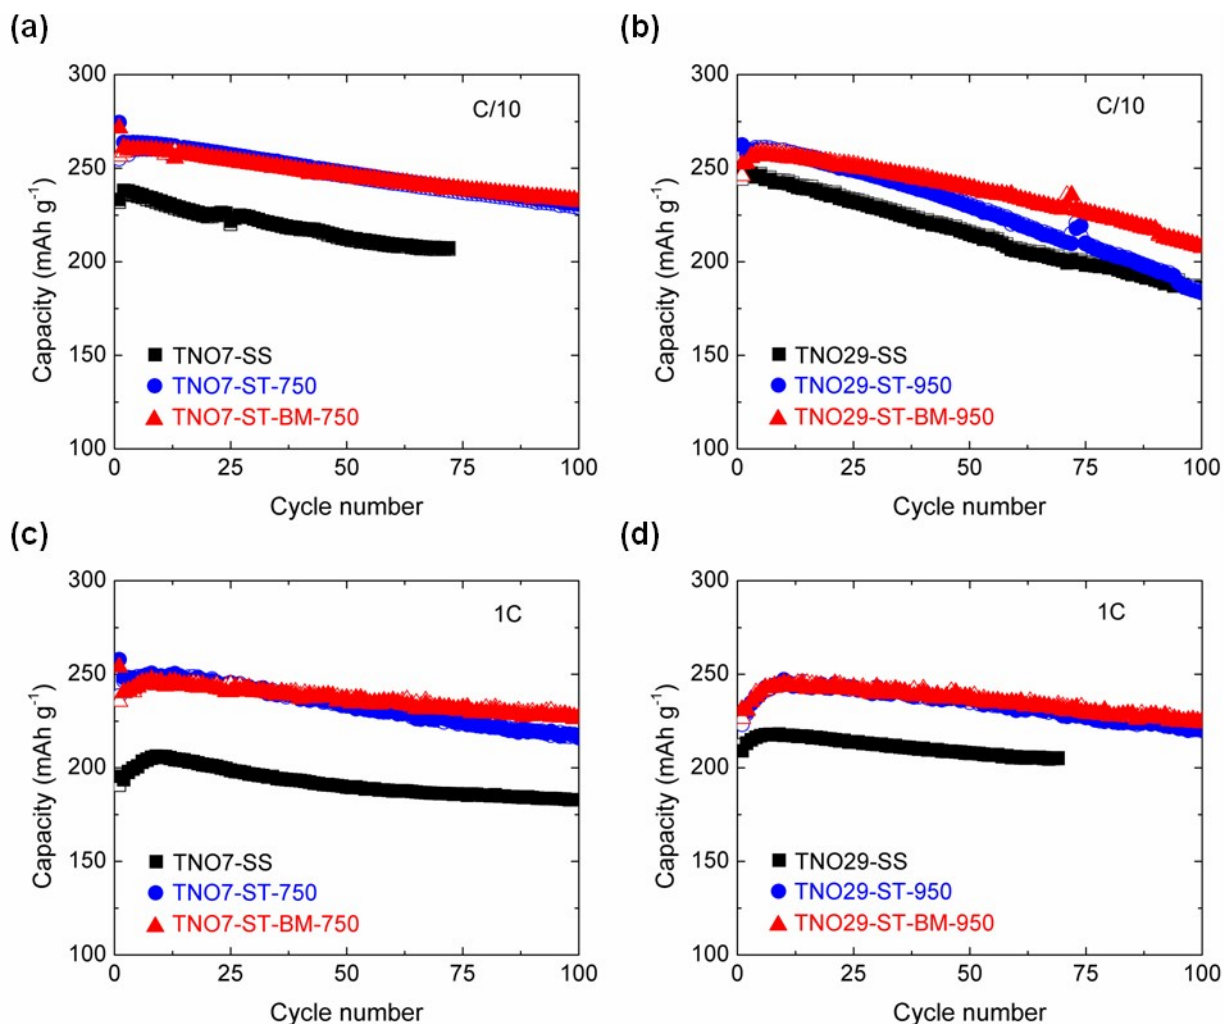

**Supplemental Figure S2.** Galvanostatic cycling at (a, b) C/10 and (c, d) 1C for (a, c) TNO7 and (b, d) TNO29 prepared by SS (black), ST (blue) and ST-BM (red). ST and ST-BM powders were fired at 750C and 950C for TNO7 and TNO29 respectively. Filled and open symbols are for discharge and charge respectively.

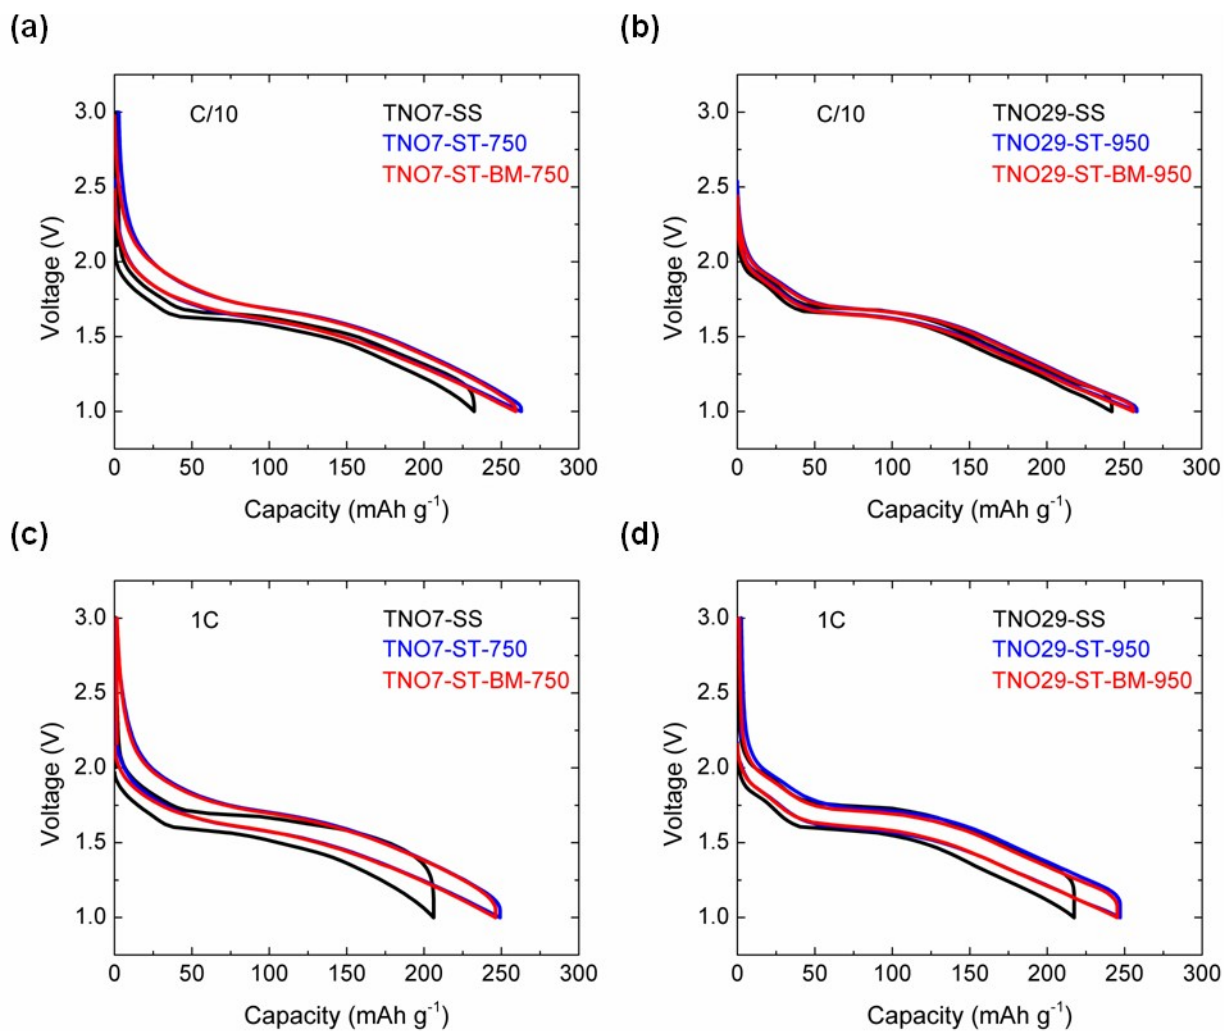

**Supplemental Figure S3.** Voltage profile of the 10<sup>th</sup> cycle at (a, b) C/10 and (c, d) 1C for (a, c) TNO7 and (b, d) TNO29 prepared by SS (black), ST (blue) and ST-BM (red). ST and ST-BM powders were fired at 750C and 950C for TNO7 and TNO29 respectively.

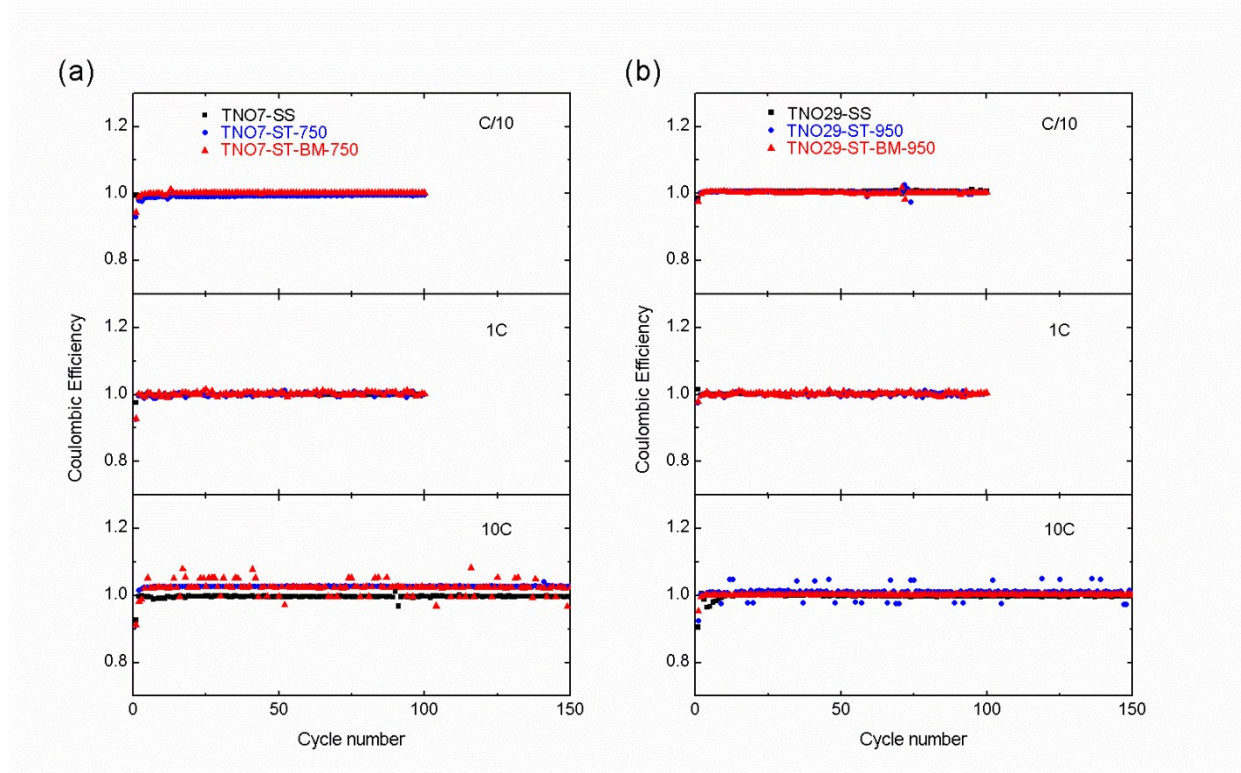

**Supplemental Figure S4.** Half cell Coulombic efficiency for the reported synthesis routes at various C-rates for (a) TNO7 and (b) TNO29.

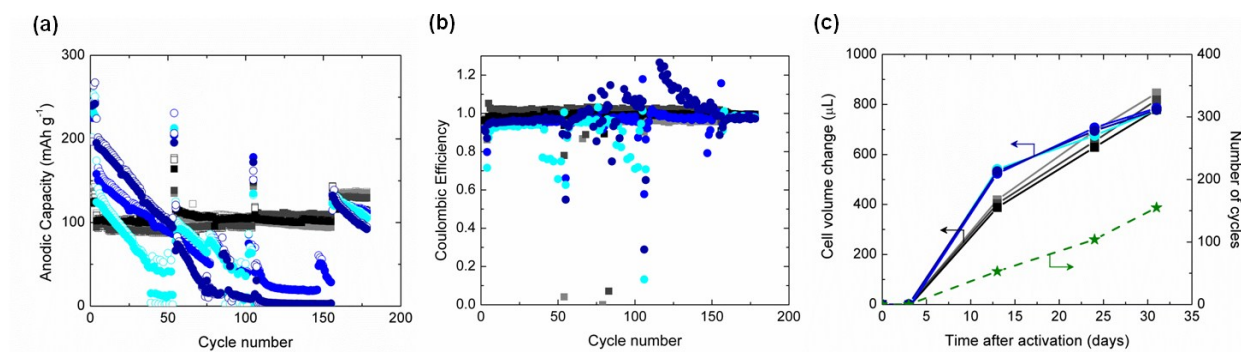

**Supplemental Figure S5.** (a) Galvanostatic cycling, (b) Coulombic efficiency, and (c) cell volume change during cycling of LTO/LMNO (black shaded lines and squares) and TNO7-32/LMNO (blue shaded lines and circles). A cell volume measurement was taken before performing three cycles at C/10 followed by 50 cycles at 1C. This scheme was performed 3 times between 3.7 and 1.0 V and once between 3.5 and 1.5 V. Filled and open symbols are for discharge and charge respectively.



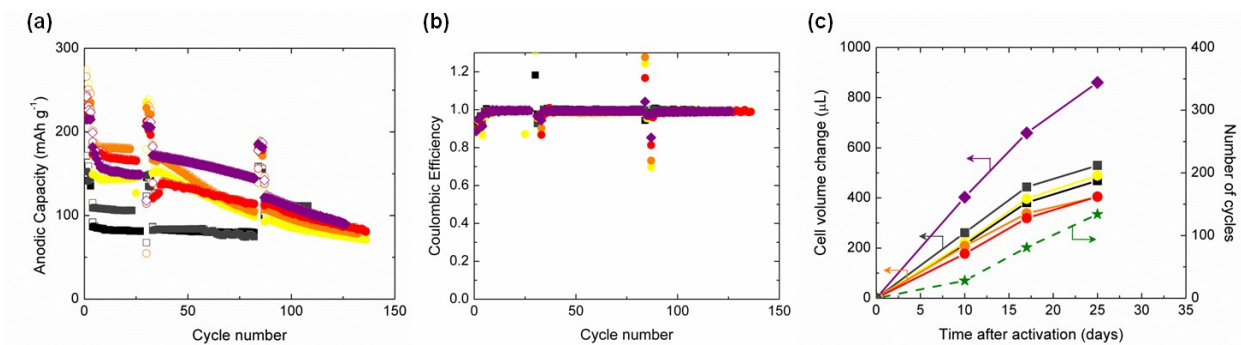

**Supplemental Figure S6.** (a) Galvanostatic cycling between 3.7 and 1.0 V, (b) Coulombic efficiency, and (c) cell volume change during cycling of LTO/LMNO (black shaded lines and squares), TNO7-6/LMNO (red shaded lines and circles), and asymmetric TNO7-6/LMNO (purple line and diamonds). A cell volume measurement was taken before performing three cycles at C/10 followed by 25 cycles at 1C. This scheme was performed 2 more times with 50 cycles at 1C. Filled and open symbols are for discharge and charge respectively.

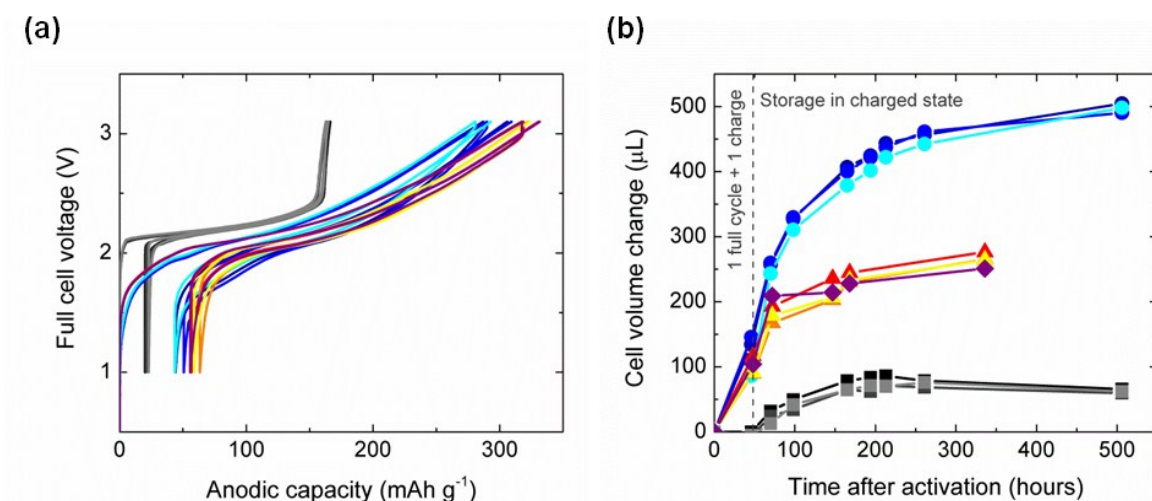

**Supplemental Figure S7.** Full cell performances of the ten pouch cells containing a NMC cathode. (a) Voltage profile of the first cycle and second charge performed before cell storage, (b) cell volume change during storage of the charged cells at 45°C. The black shaded lines and squares represent the three LTO/NMC cells, the blue shaded lines and circles represent the three TNO7-32/NMC, the red shaded lines and triangles represent the three TNO7-6/NMC cells, and the purple line and diamond represents the asymmetric TNO7-6/NMC cell.
